# Supplementary material for: Toward an Understanding of Changes in Diversity Associated with Fecal Microbiome Transplantation Based on 16S rRNA Gene Deep Sequencing
Source: PubMed Central journal article supplement — mBio. 2012 Oct 23;3(5):e00338-12. doi: 10.1128/mBio.00338-12 (PMC3482503; doi:10.1128/mbio.00338-12), 2012-10-23
Supplement: mbo005121360st1.pdf [file mbo005121360st1.pdf]

### Summary Statistics of Rank Abundance

| Sample     | Most Abundant | Number over 99% detection | Number of unique refOTUs |
|------------|---------------|---------------------------|--------------------------|
| R1 Pre     | 5428          | 50                        | 193                      |
| R1 Post-S  | 10641         | 32                        | 147                      |
| D1-S       | 708           | 48                        | 194                      |
| R2 Pre     | 779           | 89                        | 780                      |
| R2 Post-S  | 1855          | 62                        | 222                      |
| D2-S       | 471           | 76                        | 188                      |
| R3 Pre     | 8916          | 39                        | 131                      |
| R3 Post-S  | 6231          | 40                        | 141                      |
| D3-S       | 3121          | 71                        | 229                      |
| R4 Pre     | 6243          | 40                        | 126                      |
| R4 Post-S  | 1661          | 64                        | 236                      |
| D4-S       | 1210          | 42                        | 180                      |
| R5 Pre     | 2962          | 29                        | 112                      |
| R5 Post-F1 | 1917          | 26                        | 36                       |
| R5 Post-F2 | 2182          | 36                        | 144                      |
| D5-F1      | 861           | 37                        | 128                      |
| D5-F2      | 642           | 42                        | 167                      |
| R6 Pre     | 3126          | 34                        | 133                      |
| R6 Post-F  | 4038          | 32                        | 155                      |
| R6 Post-S  | 958           | 50                        | 167                      |
| D6-S       | 854           | 45                        | 220                      |
