# Supplementary material for: Toward an Understanding of Changes in Diversity Associated with Fecal Microbiome Transplantation Based on 16S rRNA Gene Deep Sequencing
Source: PubMed Central journal article supplement — mBio. 2012 Oct 23;3(5):e00338-12. doi: 10.1128/mBio.00338-12 (PMC3482503; doi:10.1128/mbio.00338-12), 2012-10-23
Supplement: mbo005121360st2.pdf [file mbo005121360st2.pdf]

## MOLECULAR IDENTITY (MID) TAGGED PRIMERS FOR THE 16s rRNA TAG PYROSEQUENCING

Fwd: Forward

Rev: Reverse

Annealing temperature: 57°C

Fwd1: CCA TCT CAT CCC TGC GTG TCT CCG ACT CAG ACG AGT GCG TAG GAT TAG ATA CCC TGG TA

Fwd2: CCA TCT CAT CCC TGC GTG TCT CCG ACT CAG ACG CTC GAC AAG GAT TAG ATA CCC TGG TA

Fwd3: CCA TCT CAT CCC TGC GTG TCT CCG ACT CAG AGA CGC ACT CAG GAT TAG ATA CCC TGG TA

Fwd4: CCA TCT CAT CCC TGC GTG TCT CCG ACT CAG AGC ACT GTA GAG GAT TAG ATA CCC TGG TA

Fwd5: CCA TCT CAT CCC TGC GTG TCT CCG ACT CAG ATC AGA CAC GAG GAT TAG ATA CCC TGG TA

Fwd6: CCA TCT CAT CCC TGC GTG TCT CCG ACT CAG ATA TCG CGA GAG GAT TAG ATA CCC TGG TA

fwd7: CCA TCT CAT CCC TGC GTG TCT CCG ACT CAG CGT GTC TCT AAG GAT TAG ATA CCC TGG TA

Fwd8: CCA TCT CAT CCC TGC GTG TCT CCG ACT CAG CTC GCG TGT CAG GAT TAG ATA CCC TGG TA

Fwd9: CCA TCT CAT CCC TGC GTG TCT CCG ACT CAG TAG TAT CAG CAG GAT TAG ATA CCC TGG TA

Fwd10: CCA TCT CAT CCC TGC GTG TCT CCG ACT CAG TCT CTA TGC GAG GAT TAG ATA CCC TGG TA

Fwd11: CCA TCT CAT CCC TGC GTG TCT CCG ACT CAG TGA TAC GTC TAG GAT TAG ATA CCC TGG TA

Fwd12: CCA TCT CAT CCC TGC GTG TCT CCG ACT CAG TAC TGA GCT AAG GAT TAG ATA CCC TGG TA

Fwd13: CCA TCT CAT CCC TGC GTG TCT CCG ACT CAG CAT AGT AGT GAG GAT TAG ATA CCC TGG TA

Fwd14: CCA TCT CAT CCC TGC GTG TCT CCG ACT CAG CGA GAG ATA CAG GAT TAG ATA CCC TGG TA

Rev1: CCT ATC CCC TGT GTG CCT TGG CAG TCT CAG ACG AGT GCG TCR RCA CGA GCT GAC GAC

Rev2: CCT ATC CCC TGT GTG CCT TGG CAG TCT CAG ACG CTC GAC ACR RCA CGA GCT GAC GAC

Rev3: CCT ATC CCC TGT GTG CCT TGG CAG TCT CAG AGA CGC ACT CCR RCA CGA GCT GAC GAC

Rev4: CCT ATC CCC TGT GTG CCT TGG CAG TCT CAG AGC ACT GTA GCR RCA CGA GCT GAC GAC

Rev5: CCT ATC CCC TGT GTG CCT TGG CAG TCT CAG ATC AGA CAC GCR RCA CGA GCT GAC GAC

Rev6: CCT ATC CCC TGT GTG CCT TGG CAG TCT CAG ATA TCG CGA GCR RCA CGA GCT GAC GAC

Rev7: CCT ATC CCC TGT GTG CCT TGG CAG TCT CAG CGT GTC TCT ACR RCA CGA GCT GAC GAC

Rev8: CCT ATC CCC TGT GTG CCT TGG CAG TCT CAG CTC GCG TGT CCR RCA CGA GCT GAC GAC

Rev9: CCT ATC CCC TGT GTG CCT TGG CAG TCT CAG TAG TAT CAG CCR RCA CGA GCT GAC GAC

Rev10: CCT ATC CCC TGT GTG CCT TGG CAG TCT CAG TCT CTA TGC GCR RCA CGA GCT GAC GAC

Rev11: CCT ATC CCC TGT GTG CCT TGG CAG TCT CAG TGA TAC GTC TCR RCA CGA GCT GAC GAC

Rev12: CCT ATC CCC TGT GTG CCT TGG CAG TCT CAG TAC TGA GCT ACR RCA CGA GCT GAC GAC

Rev13: CCT ATC CCC TGT GTG CCT TGG CAG TCT CAG CAT AGT AGT GCR RCA CGA GCT GAC GAC

Rev14: CCT ATC CCC TGT GTG CCT TGG CAG TCT CAG CGA GAG ATA CCR RCA CGA GCT GAC GAC
