# Supplementary material for: Toward an Understanding of Changes in Diversity Associated with Fecal Microbiome Transplantation Based on 16S rRNA Gene Deep Sequencing
Source: PubMed Central journal article supplement — mBio. 2012 Oct 23;3(5):e00338-12. doi: 10.1128/mBio.00338-12 (PMC3482503; doi:10.1128/mbio.00338-12), 2012-10-23
Supplement: mbo005121360st3.pdf [file mbo005121360st3.pdf]

|                                 | Donors | Pre  | Post | Fold change |            |
|---------------------------------|--------|------|------|-------------|------------|
| Coprobacillus                   |        | 0    | 11   | 0           | 0          |
| Desulfovibrio                   |        | 9    | 0    | 0           | #DIV/0!    |
| Lactococcus                     |        | 9    | 0    | 0           | #DIV/0!    |
| Ethanoligenens                  |        | 16   | 2    | 2           | 1          |
| Kluyvera                        |        | 0    | 7    | 3           | 0.42857143 |
| Unclassified Burkholderiales    |        | 15   | 25   | 6           | 0.24       |
| Dorea                           |        | 0    | 1    | 13          | 13         |
| Pantoea                         |        | 5    | 0    | 14          | #DIV/0!    |
| Carnobacteriaceae               |        | 0    | 0    | 16          | #DIV/0!    |
| Enterococcus                    |        | 0    | 11   | 21          | 1.90909091 |
| Unclassified Ruminococcaceae    |        | 12   | 54   | 21          | 0.38888889 |
| Proteus                         |        | 18   | 18   | 21          | 1.16666667 |
| Unclassified_Clostridiales      |        | 0    | 7    | 24          | 3.42857143 |
| unclassified Desulfovibrionacea |        | 0    | 24   | 34          | 1.41666667 |
| Parasutterella                  |        | 0    | 59   | 34          | 0.57627119 |
| Streptococcus                   |        | 0    | 9    | 39          | 4.33333333 |
| Unclassified                    | 269    | 19   | 39   | 2.05263158  |            |
| Veillonella                     | 93     | 91   | 56   | 0.61538462  |            |
| Lactobacillus                   | 11     | 19   | 63   | 3.31578947  |            |
| Unclassified Lachnospiraceae    | 51     | 2    | 76   | 38          |            |
| unclassified Pseudomonadaceae   | 13     | 1549 | 83   | 0.05358296  |            |
| Alistipes                       | 283    | 100  | 100  | 1           |            |
| Parabacteroides                 | 31     | 0    | 105  | #DIV/0!     |            |
| Subdoligranulum                 | 62     | 20   | 107  | 5.35        |            |
| Bifidobacterium                 | 206    | 44   | 118  | 2.68181818  |            |
| Fusobacterium                   | 46     | 167  | 122  | 0.73053892  |            |
| Roseburia                       | 115    | 128  | 133  | 1.0390625   |            |
| Raoultella                      | 149    | 9    | 153  | 17          |            |
| Escherichia/Shigella            | 124    | 1383 | 162  | 0.11713666  |            |
| Faecalibacterium                | 44     | 129  | 164  | 1.27131783  |            |
| Klebsiella                      | 109    | 199  | 212  | 1.06532663  |            |
| Bacteroides                     | 381    | 389  | 762  | 1.95886889  |            |
| unclassified Enterobacteriaceae | 240    | 1558 | 1029 | 0.66046213  |            |
