# Supplementary material for: Toward an Understanding of Changes in Diversity Associated with Fecal Microbiome Transplantation Based on 16S rRNA Gene Deep Sequencing
Source: PubMed Central journal article supplement — mBio. 2012 Oct 23;3(5):e00338-12. doi: 10.1128/mBio.00338-12 (PMC3482503; doi:10.1128/mbio.00338-12), 2012-10-23

| Rank | Genus Name                         | P-Value  | Q-Value  | Change (+/-) |          |   |
|------|------------------------------------|----------|----------|--------------|----------|---|
| 1    | 'Lactobacillus'                    | 0.00037  | 0.003148 | +            | Increase | + |
| 2    | 'Subdoligranulum'                  | 0.00037  | 0.003148 | +            | Decrease | - |
| 3    | 'Carnobacteriaceae'                | 0.00037  | 0.003148 | +            |          |   |
| 4    | 'Streptococcus'                    | 0.00037  | 0.003148 | +            |          |   |
| 5    | 'Alistepes'                        | 0.001111 | 0.006296 | +            |          |   |
| 6    | 'Enterococcus'                     | 0.001481 | 0.006296 | +            |          |   |
| 7    | 'Coprobacillus'                    | 0.001481 | 0.006296 | -            |          |   |
| 8    | 'Kluyvera'                         | 0.001852 | 0.006296 | -            |          |   |
| 9    | 'Unclassified Ruminococcaceae'     | 0.001852 | 0.006296 | +            |          |   |
| 10   | 'Unclassified'                     | 0.002222 | 0.006296 | +            |          |   |
| 11   | 'unclassified_Clostridiales'       | 0.002222 | 0.006296 | -            |          |   |
| 12   | 'Dorea'                            | 0.002222 | 0.006296 | +            |          |   |
| 13   | 'Pantoea'                          | 0.005185 | 0.013561 | +            |          |   |
| 14   | 'unclassified Desulfovibrionaceae' | 0.005926 | 0.014392 | +            |          |   |
| 15   | 'Raoultella'                       | 0.012963 | 0.026511 | -            |          |   |
| 16   | 'Unclassified Lachnospiraceae'     | 0.012963 | 0.026511 | +            |          |   |
| 17   | 'Lactococcus'                      | 0.013704 | 0.026511 | -            |          |   |
| 18   | 'Bacteroides'                      | 0.014815 | 0.026511 | +            |          |   |
| 19   | 'Veillonella'                      | 0.014815 | 0.026511 | -            |          |   |
| 20   | 'Parabacteroides'                  | 0.019259 | 0.031781 | +            |          |   |
| 21   | 'Roseburia'                        | 0.01963  | 0.031781 | -            |          |   |
| 22   | 'Parasutterella'                   | 0.034815 | 0.053805 | -            |          |   |

Histogram of p-values

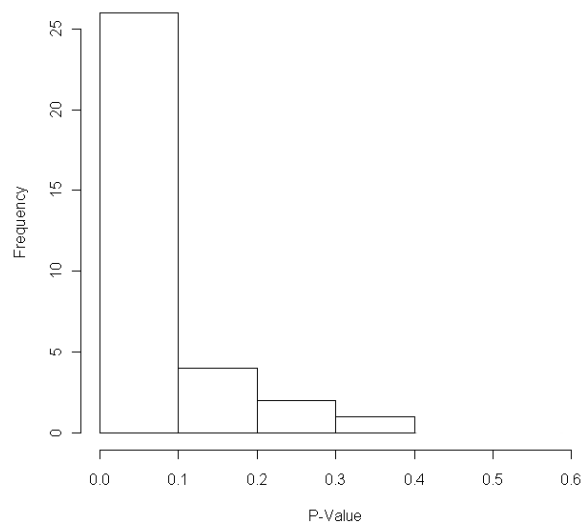

Supplement: mbo005121360st5.pdf [file mbo005121360st5.pdf]
